# Supplementary material
Source: Springer Nature journal article supplement (https://www.springermedizin.de/resource/supplementary/12943_2014_1496_MOESM2_ESM.pdf/9553028)
Supplement: MOESM2 [file 9553028]

| Type of GIST | GIST name | Type of chromosome aberration | GENETIC                                                                                                            |                                                                                                                                                                                                                                                                                                                                                                                                                                                               | cnLOH                                                                                     |
|--------------|-----------|-------------------------------|--------------------------------------------------------------------------------------------------------------------|---------------------------------------------------------------------------------------------------------------------------------------------------------------------------------------------------------------------------------------------------------------------------------------------------------------------------------------------------------------------------------------------------------------------------------------------------------------|-------------------------------------------------------------------------------------------|
|              |           |                               | LOSSES                                                                                                             | GAINS                                                                                                                                                                                                                                                                                                                                                                                                                                                         |                                                                                           |
| PolyGIST     | 10C2      | Whole                         |                                                                                                                    | 1, 2, 3, 3, 4, 4, 5, 5, 6, 6, 7, 7, 8, 8, 9, 9, 10, 10, 11, 11, 12, 12, 13, 13, 14, 15, 16, 16, 17, 17, 18, 19, 19, 20, 20, 21, 22, 22                                                                                                                                                                                                                                                                                                                        |                                                                                           |
|              |           | Arm                           |                                                                                                                    | 1q, 2q, 17q, 18q, 18q                                                                                                                                                                                                                                                                                                                                                                                                                                         |                                                                                           |
|              |           | Segmetal                      |                                                                                                                    | 19pter-q31.31                                                                                                                                                                                                                                                                                                                                                                                                                                                 |                                                                                           |
|              | 15C2      | Whole                         |                                                                                                                    | 1, 2, 2, 3, 3, 4, 4, 5, 5, 6, 6, 7, 7, 8, 8, 9, 9, 10, 10, 11, 11, 12, 12, 13, 13, 14, 15, 15, 16, 16, 17, 17, 18, 18, 19, 19, 20, 20, 21, 21, 22, 22                                                                                                                                                                                                                                                                                                         |                                                                                           |
|              |           | Arm                           |                                                                                                                    | 1q, 1q, 2p                                                                                                                                                                                                                                                                                                                                                                                                                                                    |                                                                                           |
|              |           | Segmetal                      |                                                                                                                    | 2q11.1-q14.1                                                                                                                                                                                                                                                                                                                                                                                                                                                  |                                                                                           |
|              | 29s2      | Whole                         |                                                                                                                    | 2, 2, 5, 6, 7, 7, 8, 10, 16, 17, 17, 18, 19, 19, 20, 21                                                                                                                                                                                                                                                                                                                                                                                                       |                                                                                           |
|              |           | Arm                           |                                                                                                                    | 1q, 5p                                                                                                                                                                                                                                                                                                                                                                                                                                                        |                                                                                           |
|              |           | Segmetal                      |                                                                                                                    | 1pter-p36.32, 1p36.31-p36.23, 1p36.22-p36.11, 1p35.2, 1p35.1.3-p34.2, 1p34.2-p34.1, 1p33, 1p32.3, 1p32.2-p31.3, 1p31.3-p31.1, 1p31.1, 1p31.1, 1p22.1-p21.3.3, 1p21.3-13.2, 1p13.1-p12, 4p15.2-15.1, 4p15.2-15.1, 4p15.2-15.1, 4p15.1-p14, 4p13-p11, 4q11-q13.1, 4q31.3-q32.3, 4q34.1-q35.2, 5q11.1-q13.2, 11pter-q12.2, 11q12.2-q22.3, 11q12.2-q13.3, 11q13.1-q13.3, 11q14.1, 11q14.1, 11q14.1-q21, 11q21-q22.1, 11q21-q22.1, 12p13.33-q21.33, 12q23.1-q24.13 | 4q11-q32.1, 4q32.3-q34.1, 4q35.2-qter, 11q12.1-q12.2, 11q12.3-q13.1, 11q22.3-q23.3        |
|              | 27s2      | Whole                         |                                                                                                                    | 2, 4, 4, 5, 5, 7, 7, 8, 10, 12, 13, 13, 15, 15, 16, 16, 17, 17, 18, 18, 18, 19, 20, 20, 21, 22, 22                                                                                                                                                                                                                                                                                                                                                            | 11                                                                                        |
|              |           | Arm                           |                                                                                                                    | 3q, 3q, 7q, 9q, 19p                                                                                                                                                                                                                                                                                                                                                                                                                                           | 3p                                                                                        |
|              |           | Segmetal                      |                                                                                                                    | 1pter-p36.12, 1p35.3-p34.3, 1p34.3-qter, 1p34.3-qter, 6pter-p25.1, 6pter-p25.1, 6p25.1-qter, 9p13.3-13.1, 9p13.3-13.1, 9p13.2-p13.1, 14q32.2, 14q32.2, 14q32.3-qter                                                                                                                                                                                                                                                                                           | 1p36.12-p34.3, 6p25.1, 9pter-p13.3, 14q11.1-q32.2                                         |
|              | 20s2      | Whole                         | 9, 14, 22                                                                                                          | 1, 2, 2, 3, 4, 4, 5, 5, 6, 6, 7, 7, 8, 8, 10, 10, 12, 12, 12, 15, 15, 16, 16, 17, 17, 18, 18, 19, 19, 20, 20, 21, 21                                                                                                                                                                                                                                                                                                                                          |                                                                                           |
|              |           | Arm                           |                                                                                                                    | 1q, 3p, 11q, 11q                                                                                                                                                                                                                                                                                                                                                                                                                                              | 4q, 11p                                                                                   |
|              |           | Segmetal                      | 5p14.1, 5p13.3, 5p12-p11, 5q34, 6q15, 6q14.1, 9p21.3, 9p21.3-21.2, 13q31.1, 13q33.3-q34                            | 13q31.1-q33.3, 13q31.1-q33.3, 13q34-qter, 13q34-qter                                                                                                                                                                                                                                                                                                                                                                                                          |                                                                                           |
|              | 1C2       | Whole                         |                                                                                                                    | 2, 5, 5, 7, 7, 8, 8, 12, 12, 16, 16, 17, 18, 18, 19, 19, 20, 20                                                                                                                                                                                                                                                                                                                                                                                               | 3, 9, 10, 13, 15, 21, 22                                                                  |
|              |           | Arm                           |                                                                                                                    | 2p, 4p, 6p, 17p                                                                                                                                                                                                                                                                                                                                                                                                                                               | 1p, 4q, 6q                                                                                |
|              |           | Segmetal                      |                                                                                                                    | 1q12-q22, 1q12-q22, 1q24.2-q25.1, 1q25.2-q25.3, 1q32.1-q32.2, 1q32.1-q32.2, 7q22.1-qter, 11p12-q14.1, 11p12-q14.1, 11q13.2, 11q13.4-q14.1, 14q11.1-q12, 14q11.1-q12                                                                                                                                                                                                                                                                                           | 1q22-q24.2, 1q25.1-q25.2, 1q25.3-q32.1, 1q32.2-qter, 11pter-p12, 11q14.1-qter, 14q12-qter |
|              | 3C2       | Whole                         |                                                                                                                    | 2, 5, 7, 7, 8, 8, 12, 12, 19, 20, 20, 22                                                                                                                                                                                                                                                                                                                                                                                                                      | 1, 3, 4, 9, 10, 11, 13, 4, 15, 16, 18, 21                                                 |
|              |           | Arm                           |                                                                                                                    | 2q                                                                                                                                                                                                                                                                                                                                                                                                                                                            |                                                                                           |
|              |           | Segmetal                      |                                                                                                                    | 6pter-p12.3, 6p12.1-q14.1, 6q22.31-qter, 17q21.32-qter, 22q11.21-qter                                                                                                                                                                                                                                                                                                                                                                                         |                                                                                           |
| 19s2         | Whole     | 14                            | 4, 5, 12, 12, 16, 18, 18, 18, 21                                                                                   | 1, 2, 3, 5, 6, 10, 11, 15, 21, 22                                                                                                                                                                                                                                                                                                                                                                                                                             |                                                                                           |
|              | Arm       |                               | 7q, 8q, 17q                                                                                                        | 7p, 9q, 17p                                                                                                                                                                                                                                                                                                                                                                                                                                                   |                                                                                           |
|              | Segmetal  | 2q22.1, 9p21.3-p21.2          | 8pter-p23.2, 8p23.1, 8p22, 8p21.3, 8p21.3, 8p21.2, 8p21.2, 8p12, 8p11.22-8p11.1, 8p11.21, 17q12-ter, 19pter-q13.12 | 8p23.2-p21.3, 8p21.3, 8p21.2, 8p21.1-8p12, 8p12-8p11.23, 9pter-p24.1, 19q13.12-qter                                                                                                                                                                                                                                                                                                                                                                           |                                                                                           |
| 12C2         | Whole     |                               | 4, 6, 8, 8, 12, 15, 16, 18, 20                                                                                     | 1, 10, 11                                                                                                                                                                                                                                                                                                                                                                                                                                                     |                                                                                           |
|              | Arm       |                               | 7p                                                                                                                 | 7q                                                                                                                                                                                                                                                                                                                                                                                                                                                            |                                                                                           |
|              | Segmetal  |                               | 5pter-q31.1, 5q33.2-qter                                                                                           |                                                                                                                                                                                                                                                                                                                                                                                                                                                               |                                                                                           |

|          |          |                                                                                               |                                                                                                                               |                                                      |                                      |
|----------|----------|-----------------------------------------------------------------------------------------------|-------------------------------------------------------------------------------------------------------------------------------|------------------------------------------------------|--------------------------------------|
| BIGIST   | 28s2     | Whole                                                                                         | 14                                                                                                                            |                                                      | 4                                    |
|          |          | Arm                                                                                           | 1p                                                                                                                            | 9q                                                   |                                      |
|          |          | Segmetal                                                                                      | 1q43-qter, 6q16.3-q24.2, 6q25.1-q27                                                                                           |                                                      |                                      |
|          | 31s2     | Whole                                                                                         | 14, 15, 22                                                                                                                    |                                                      |                                      |
|          |          | Arm                                                                                           | 1p, 2p, 6q, 12p, 18q                                                                                                          | 1q, 5p, 7q, 7q                                       | 2q, 4q                               |
|          |          | Segmetal                                                                                      | 12q24.32-qter                                                                                                                 | 5q14.3-qter, 8q12.3-qter                             | 16q22.1-q22.3                        |
|          | 5C3      | Whole                                                                                         | 13, 15, 22                                                                                                                    |                                                      |                                      |
|          |          | Arm                                                                                           | 1p, 18q                                                                                                                       | 1q                                                   |                                      |
|          |          | Segmetal                                                                                      | 2p25.2-p22.2, 2q22.1-q22.2, 3pter-p14.3, 4pter-15.31, 4q13.2-qter, 15q25.3                                                    | 3q21.3-qter                                          |                                      |
|          | 30s2     | Whole                                                                                         | 22                                                                                                                            |                                                      | 2                                    |
|          |          | Arm                                                                                           | 1p                                                                                                                            | 4p, 8q                                               | 4q                                   |
|          |          | Segmetal                                                                                      | 5pter-p14.3, 11p15.1-qter, 13q14.11-qter, 14q11.1-q12, 14q21.1-q21.3, 14q23.2-qter, 15q11.1-q24.1, 20q12-q13.13, 20q13.2-qter | 8pter-p23.2, 8p23.2-p23.1, 8p23.1, 8p12-p11.21       | 6q11-q13, 8p23.1-p12, 8p23.1, 8p23.2 |
|          | 24s2     | Whole                                                                                         | 14, 15, 22                                                                                                                    |                                                      |                                      |
|          |          | Arm                                                                                           | 1p, 17p                                                                                                                       | 1q                                                   |                                      |
|          |          | Segmetal                                                                                      |                                                                                                                               |                                                      |                                      |
|          | 4C       | Whole                                                                                         | 14, 15, 22                                                                                                                    |                                                      |                                      |
|          |          | Arm                                                                                           | 1p, 8p                                                                                                                        | 4p                                                   | 2q, 4q                               |
|          |          | Segmetal                                                                                      | 11q13.1-qter                                                                                                                  |                                                      |                                      |
|          | 2P2      | Whole                                                                                         | 14                                                                                                                            | 18                                                   |                                      |
|          |          | Arm                                                                                           |                                                                                                                               |                                                      |                                      |
| Segmetal |          | 1p36.31-p351, 9q33.3-qter, 22q11.23-qter                                                      |                                                                                                                               | 2q14.3-q21.1, 13q22.1-q31.1                          |                                      |
| 18C3     | Whole    | 9, 10, 14, 15, 18, 22                                                                         |                                                                                                                               | 4                                                    |                                      |
|          | Arm      | 1p, 17p                                                                                       | 5p                                                                                                                            |                                                      |                                      |
|          | Segmetal | 1p33, 3pter-p14.1, 6q22.31-qter, 7p11.2-q33, 7q34-q35, 7q36.1-ter, 9p21.3                     | 3p14.1-p13, 8q23.1-q24.3                                                                                                      |                                                      |                                      |
| 6C3      | Whole    | 4, 9, 14, 22                                                                                  |                                                                                                                               | 11                                                   |                                      |
|          | Arm      | 3p                                                                                            |                                                                                                                               |                                                      |                                      |
|          | Segmetal | 1pter-p32.2, 1p13.2-p11, 1q42.13-qter, 13q21.1-q31.3, 13q34-qter                              |                                                                                                                               |                                                      |                                      |
| 32s2     | Whole    | 15, 22                                                                                        |                                                                                                                               | 4                                                    |                                      |
|          | Arm      | 1p, 18p                                                                                       |                                                                                                                               |                                                      |                                      |
|          | Segmetal | 1p36.32, 9pter-p21.1, 13q11-q12.3, 13q14.11-q21.33, 13q22.2-q31.1, 13q31.1-q32.1, 13q33.1-q34 | 9p13.3                                                                                                                        |                                                      |                                      |
| 22s2     | Whole    | 14                                                                                            |                                                                                                                               |                                                      |                                      |
|          | Arm      |                                                                                               |                                                                                                                               |                                                      |                                      |
|          | Segmetal |                                                                                               |                                                                                                                               |                                                      |                                      |
| 23s2     | Whole    | 14                                                                                            |                                                                                                                               |                                                      |                                      |
|          | Arm      | 11p                                                                                           |                                                                                                                               |                                                      |                                      |
|          | Segmetal |                                                                                               |                                                                                                                               | 3q13.11-q13.2, 7p21.1, 7q11.21-q11.22, 8q21.13-q21.3 |                                      |
| 14C2     | Whole    |                                                                                               |                                                                                                                               |                                                      |                                      |
|          | Arm      |                                                                                               |                                                                                                                               |                                                      |                                      |
|          | Segmetal |                                                                                               |                                                                                                                               |                                                      |                                      |
